# Supplementary material for: Small Molecule Drugs That Inhibit Phagocytosis
Source: MDPI journal article supplement (doi:10.3390/molecules28020757), 2023-01-12
Supplement: s1 [file s1]

# Supplementary Information

## Small Molecule Drugs That Inhibit Phagocytosis

Melika Loriani<sup>1,2</sup>, Melissa M. Lewis-Bakker<sup>3</sup>, Kayluz Frias Boligan<sup>1</sup>, Siming Wang<sup>3</sup>,  
Mairead B. Holton<sup>1</sup>, Lakshmi P. Kotra<sup>3,4,\*</sup> and Donald R. Branch<sup>1,2,5,6,\*</sup>

<sup>1</sup> Centre for Innovation, Canadian Blood Services, Toronto, ON M5G 2M1, Canada

<sup>2</sup> Department of Laboratory Medicine and Pathobiology, University of Toronto, Toronto, ON M5S 1A8, Canada

<sup>3</sup> Krembil Research Institute, University Health Network, Toronto, ON M5G 1L7, Canada

<sup>4</sup> Department of Pharmaceutical Sciences, Leslie Dan Faculty of Pharmacy, University of Toronto, Toronto, ON M5S 3M2, Canada

<sup>5</sup> Department of Medicine, University of Toronto, Toronto, ON M5S 1A8, Canada

<sup>6</sup> Keenan Research Centre, Canadian Blood Services, Toronto, ON M5B 1W8, Canada

\*Correspondence: p.kotra@utoronto.ca (L.P.K.); don.branch@utoronto.ca (D.R.B.);

Tel.: +1-416-581-7602 (L.P.K.); +1-416-313-4458 (D.R.B.)

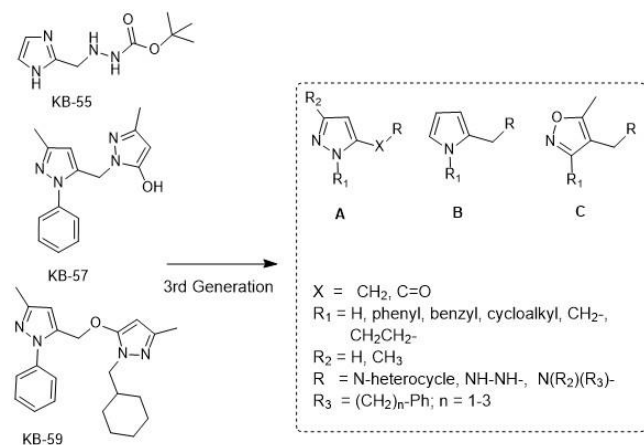

**Figure S1.** Unpublished 3rd generation structures based on merging the features of KB-55, KB-57 [6] and KB-59 [6].

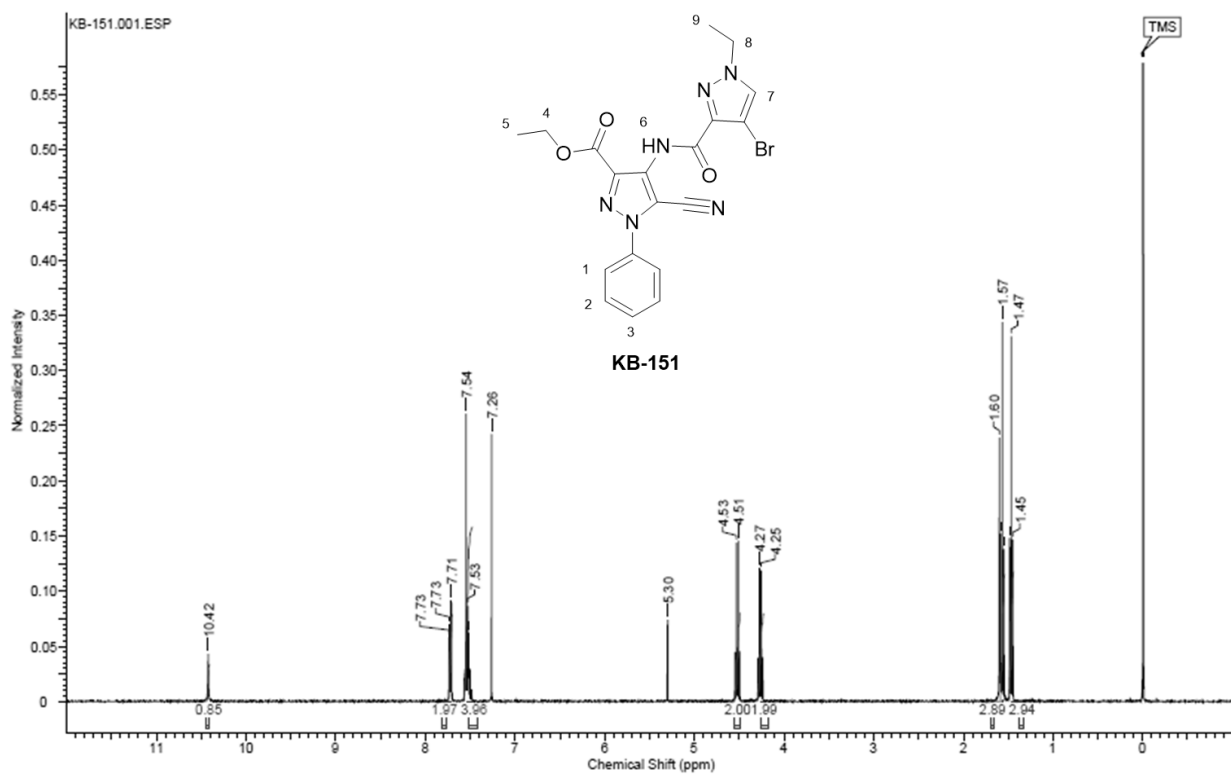

Figure S2.  $^1\text{H}$ -NMR spectrum of KB-151 obtained using the method as described in Section 4.2 of main text.

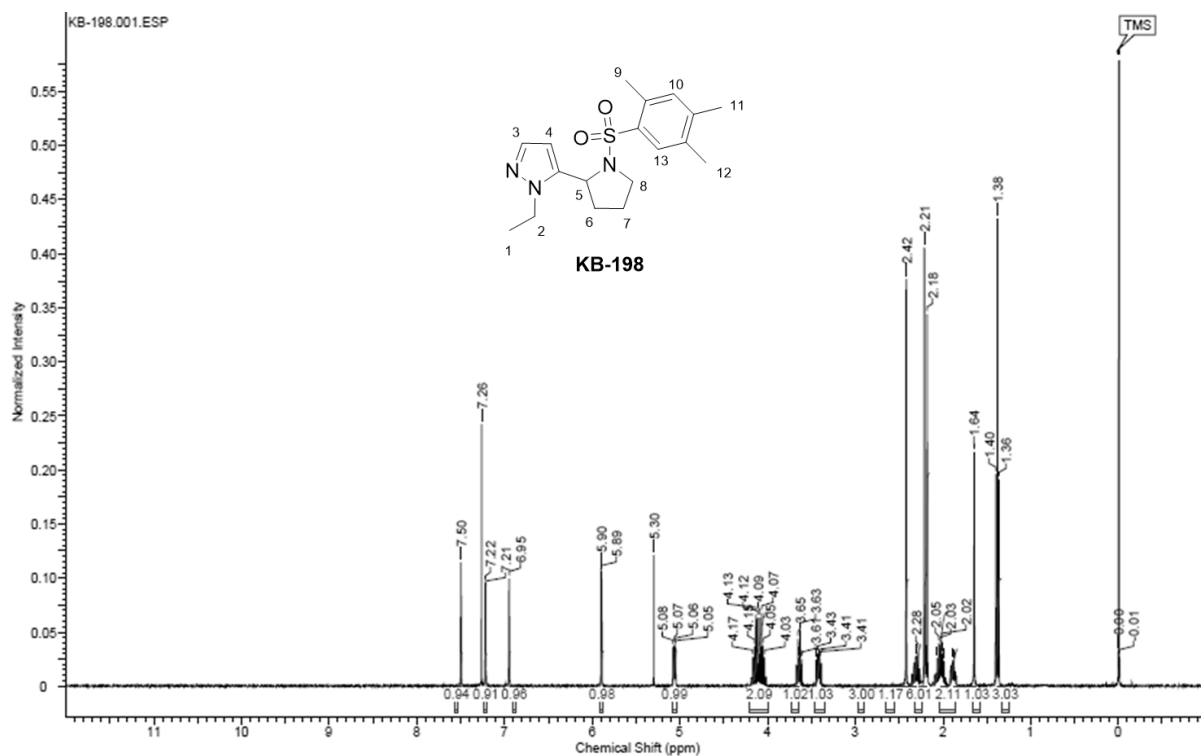

Figure S3.  $^1\text{H}$ -NMR spectrum of KB-198 obtained using the method as described in Section 4.2 of main text.

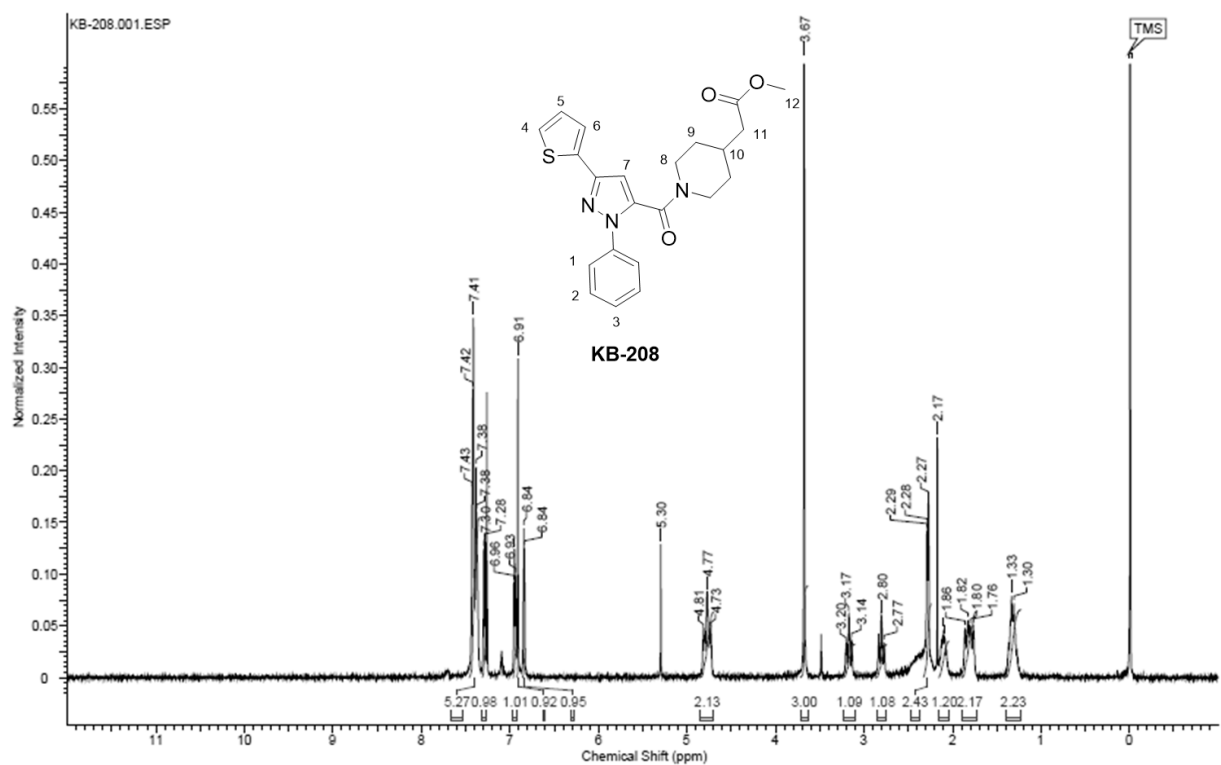

Figure S4.  $^1\text{H}$ -NMR spectrum of KB-208 obtained using the method as described in Section 4.2 of main text.

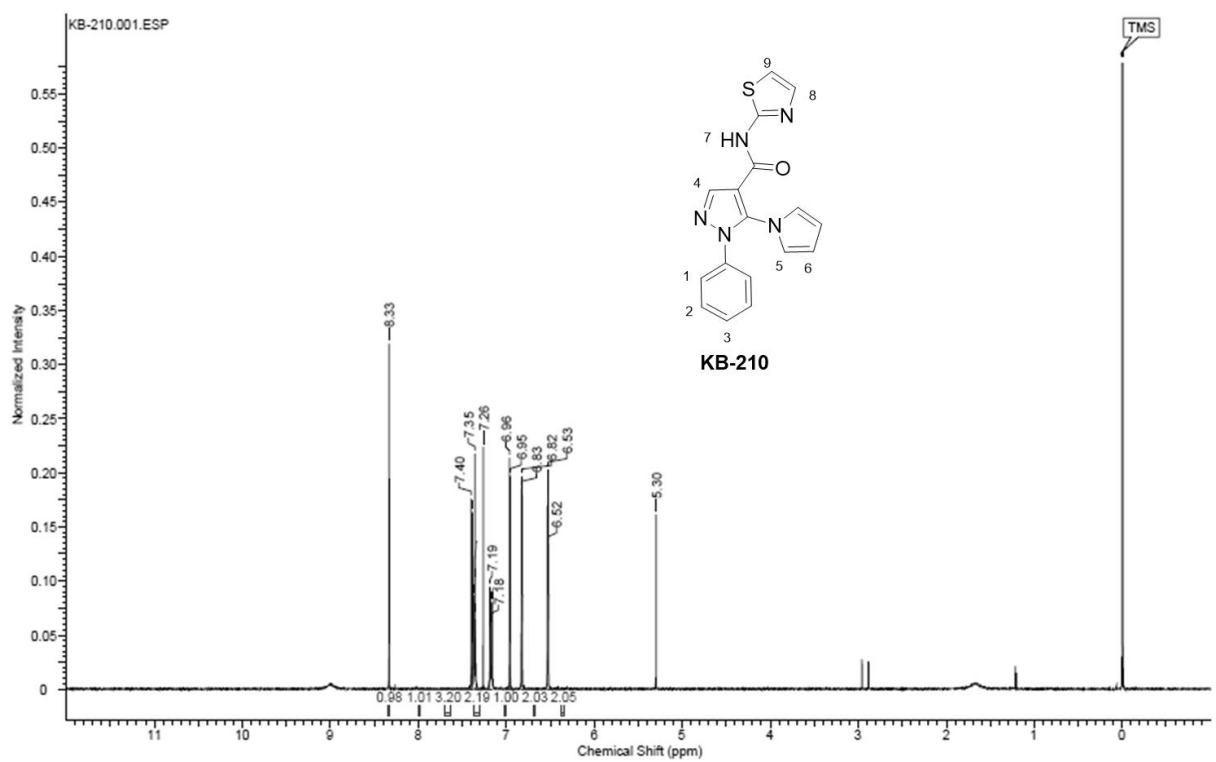

Figure S5.  $^1\text{H}$ -NMR spectrum of KB-210 obtained using the method as described in Section 4.2 of main text.

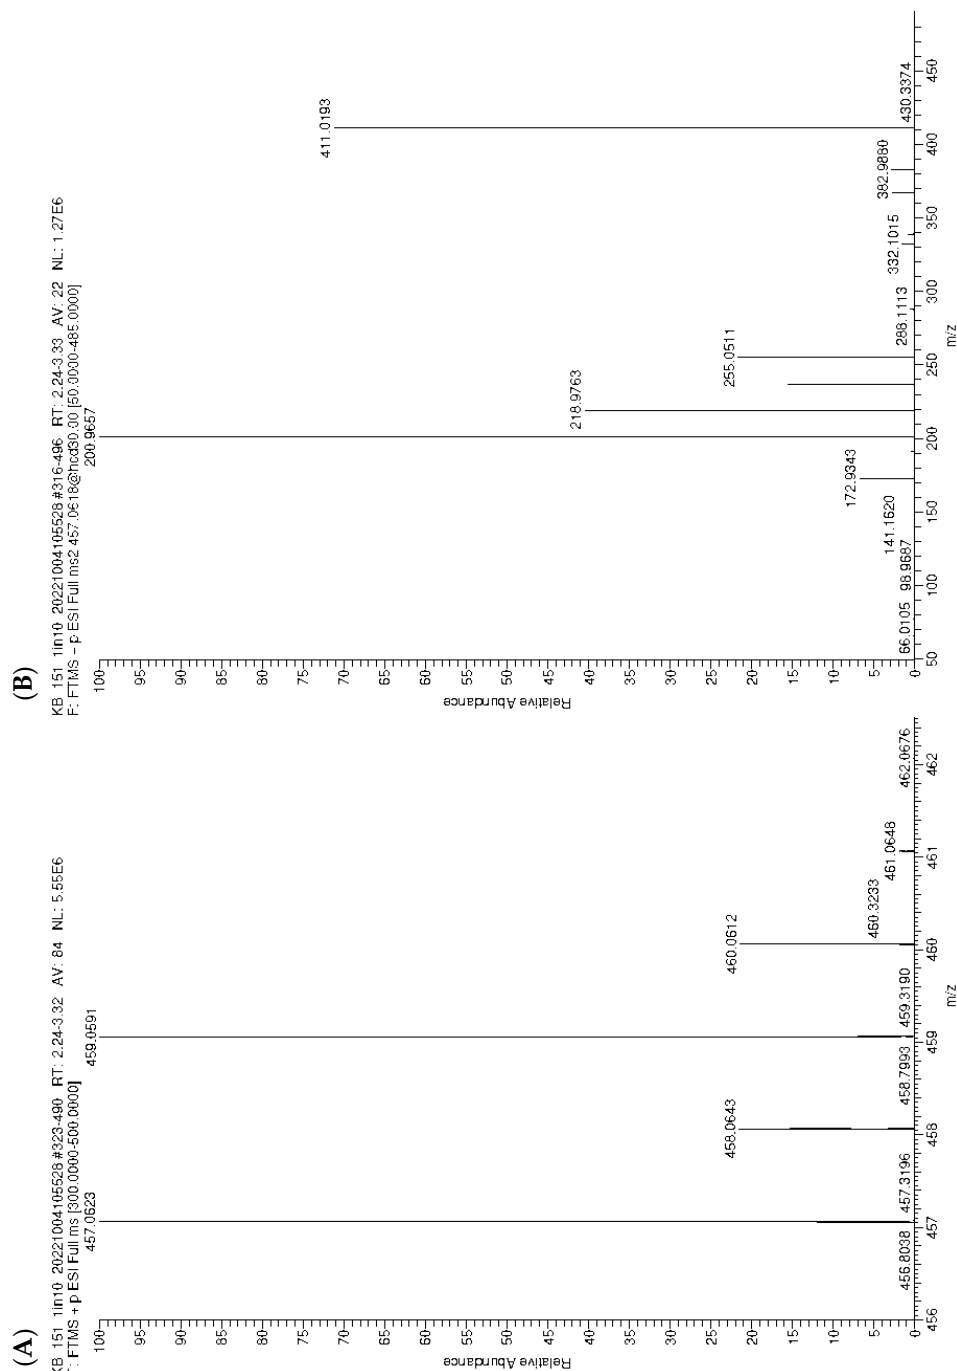

**Figure S6.** UHPLC-HRMS/MS spectrum of **KB-151** obtained using the method as described in Section 4.3 of main text. **(A)** MS1 and **(B)** MS2.

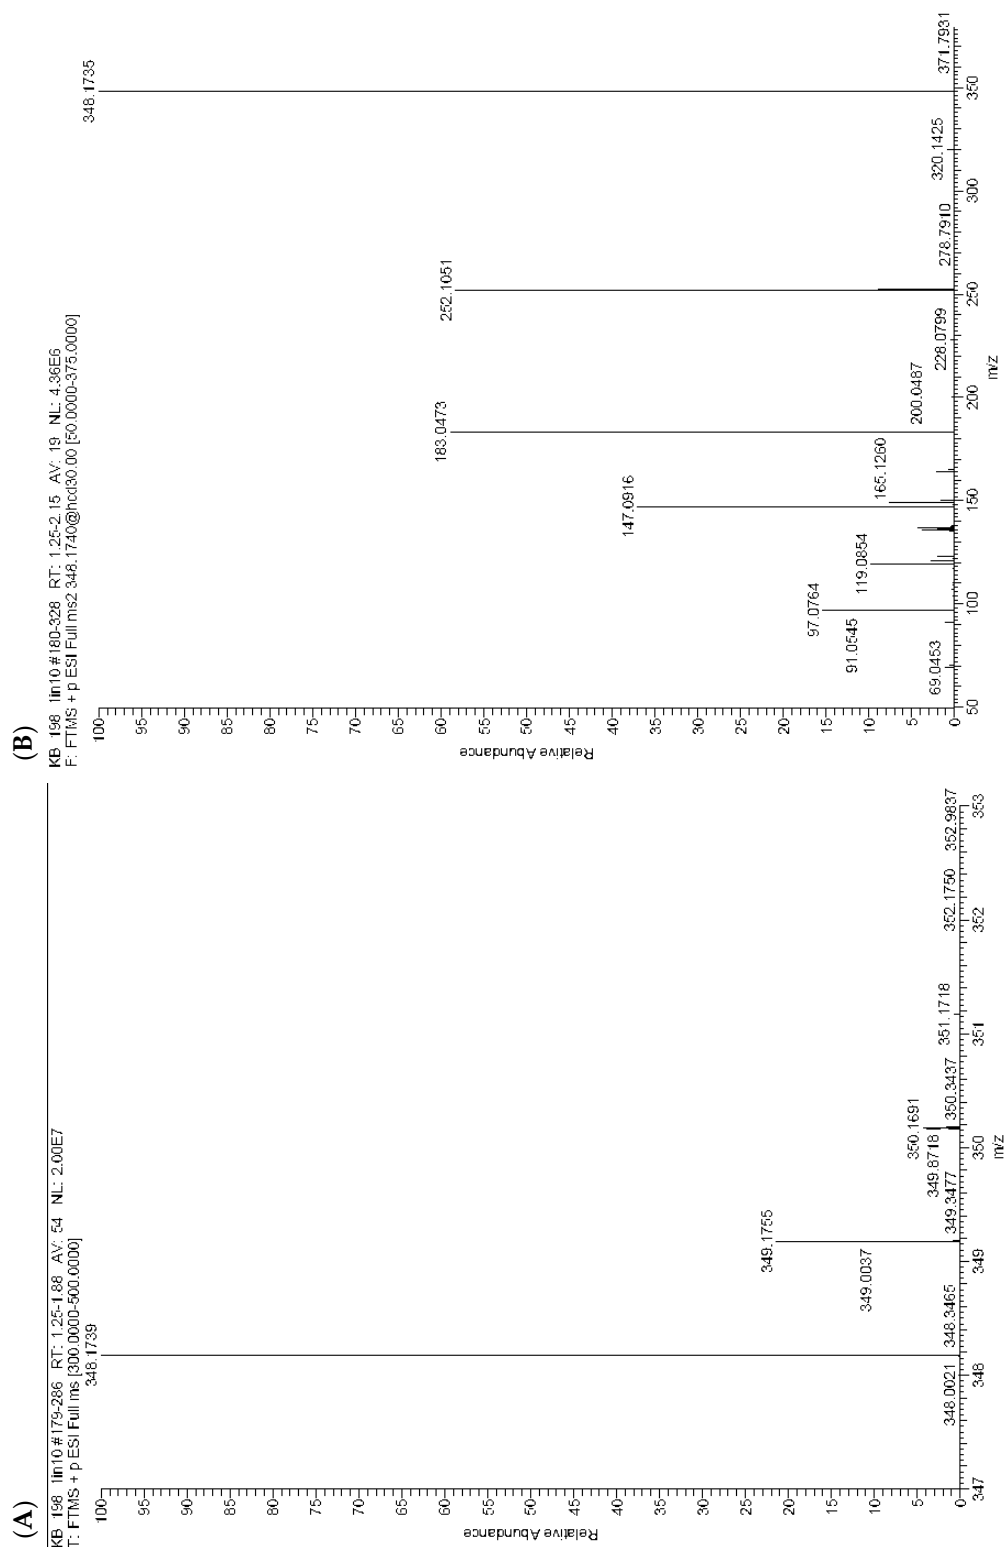

**Figure S7.** UHPLC-HRMS/MS spectrum of **KB-198** obtained using the method as described in Section 4.3 of main text. (A) MS1 and (B) MS2.

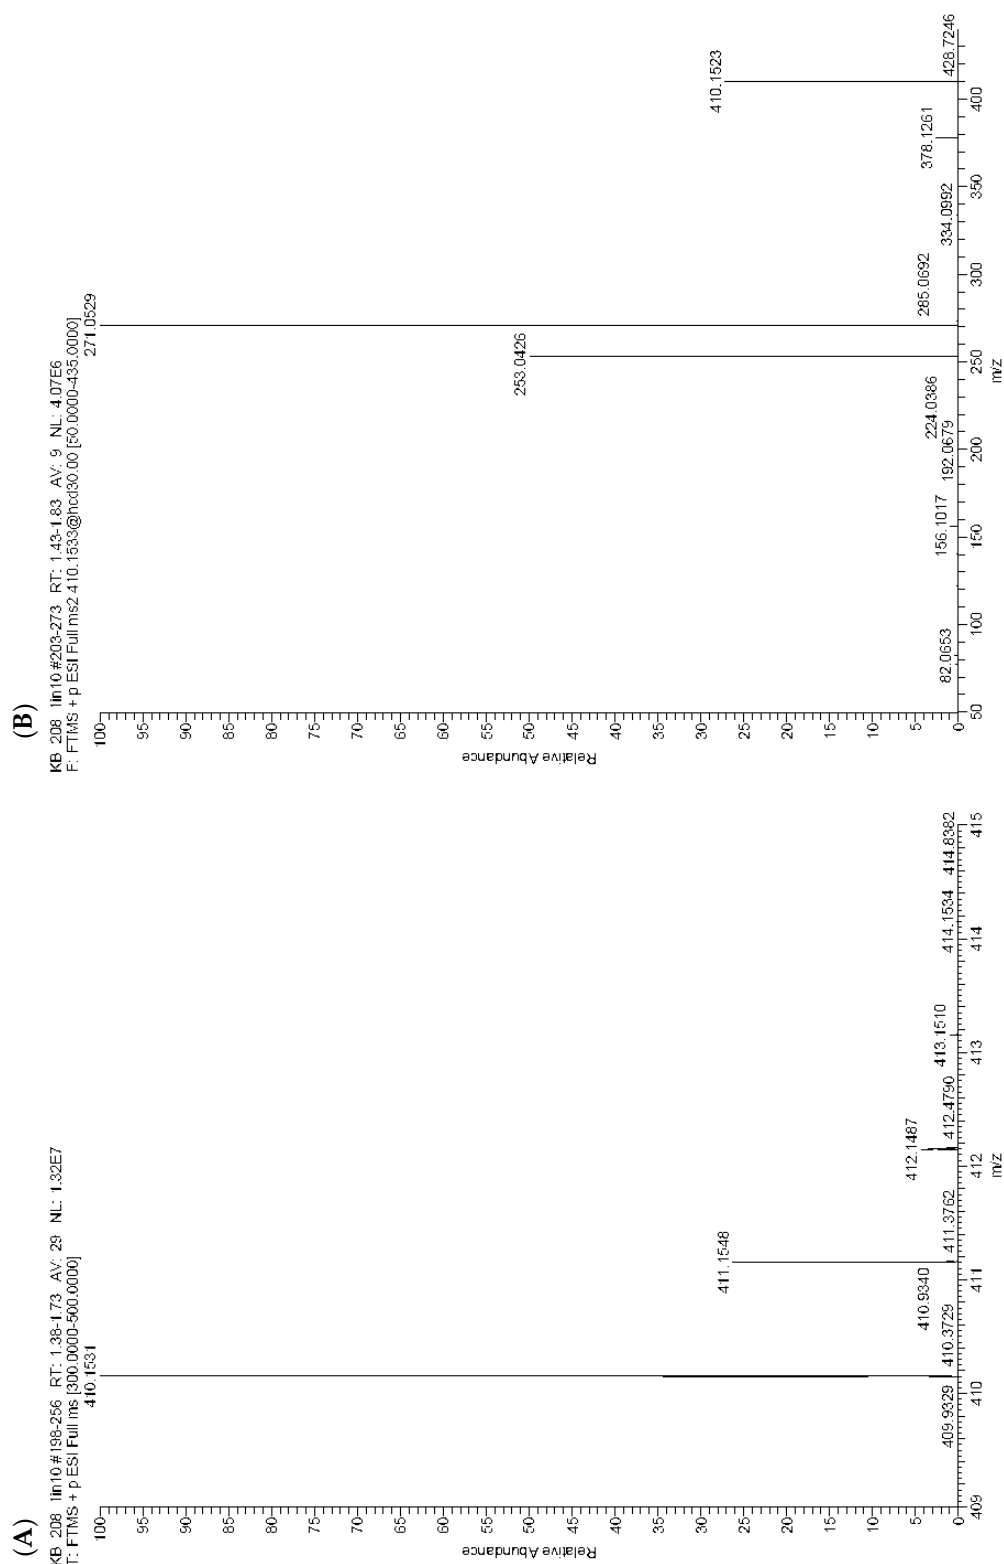

**Figure S8.** UHPLC-HRMS/MS spectrum of **KB-208** obtained using the method as described in Section 4.3 of main text. (A) MS1 and (B) MS2.

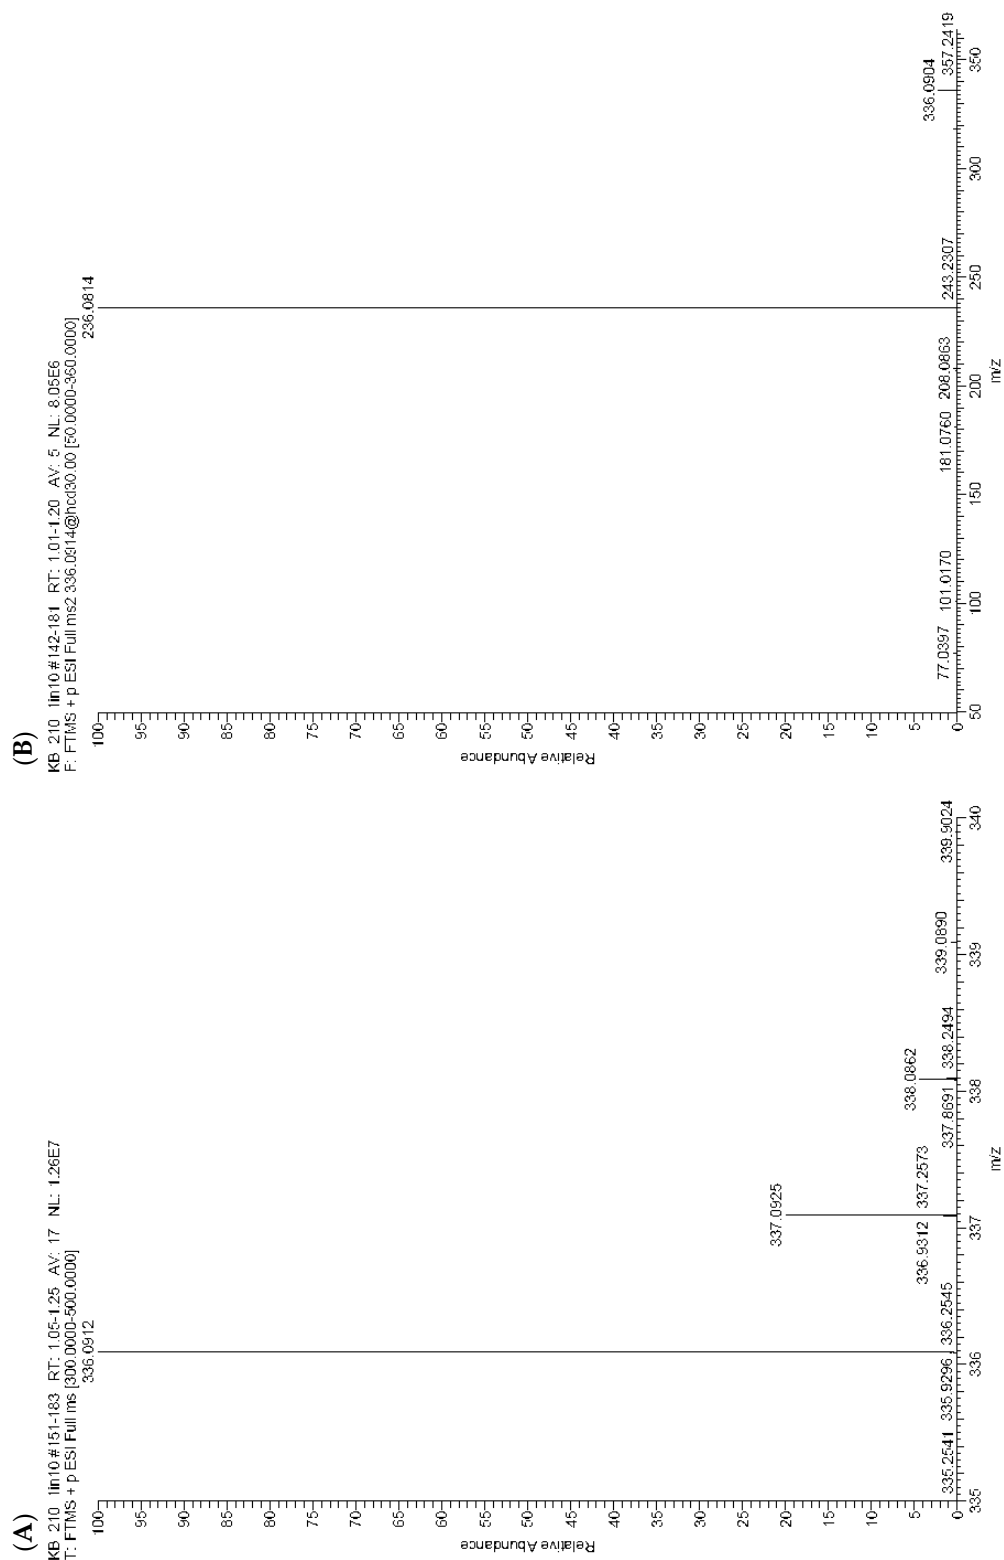

**Figure S9.** UHPLC-HRMS/MS spectrum of **KB-210** obtained using the method as described in Section 4.3 of main text. **(A)** MS1 and **(B)** MS2.

**Table S1.** Purity results of hit compounds using methods as described in Section 4.4 of main text.

| Chemical Compound | Purity (%) |          |
|-------------------|------------|----------|
|                   | Method A   | Method B |
| KB-151            | 95         | 97       |
| KB-198            | 98         | 96       |
| KB-208            | 95         | 95       |
| KB-210            | 99         | 97       |



(A)

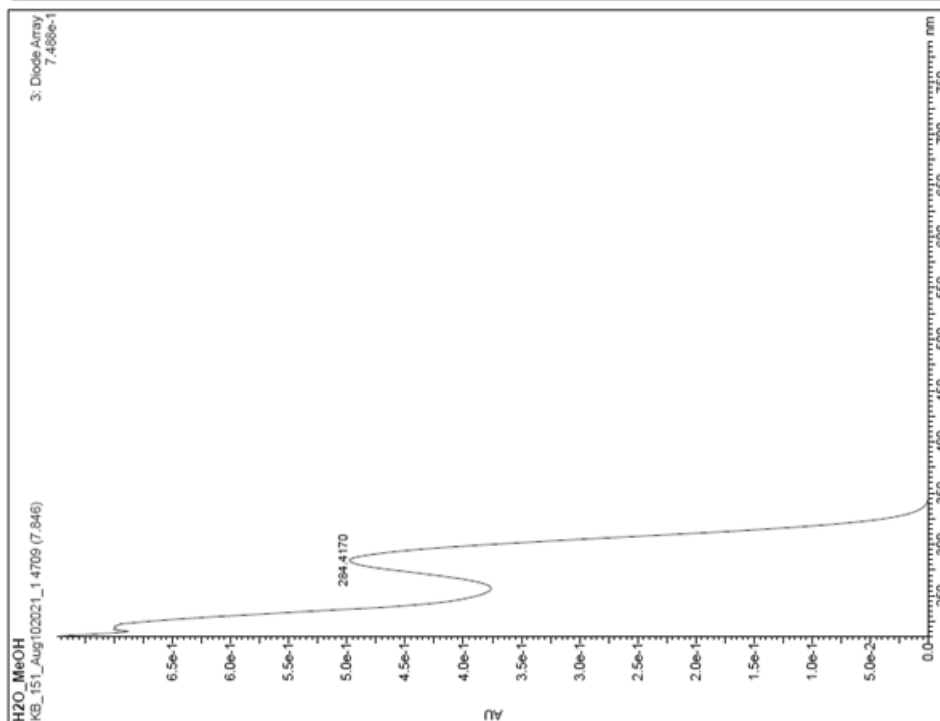

(B)

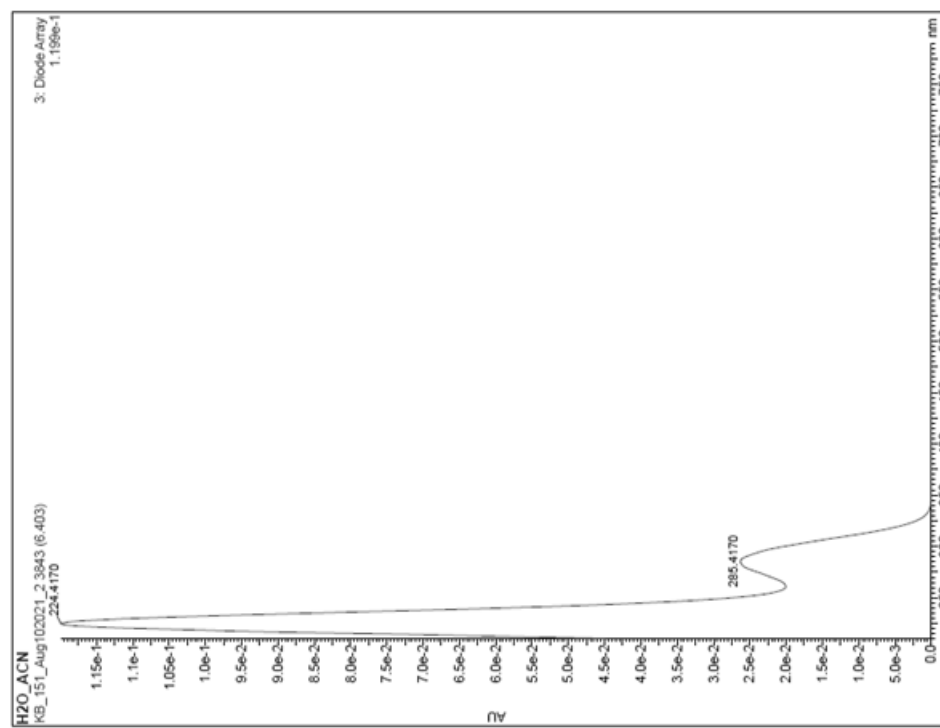

**Figure S11.** HPLC-PDA spectrum of **KB-151** using the method as described in Section 4.4 of main text. (A) Method A and (B) Method B.

(A)

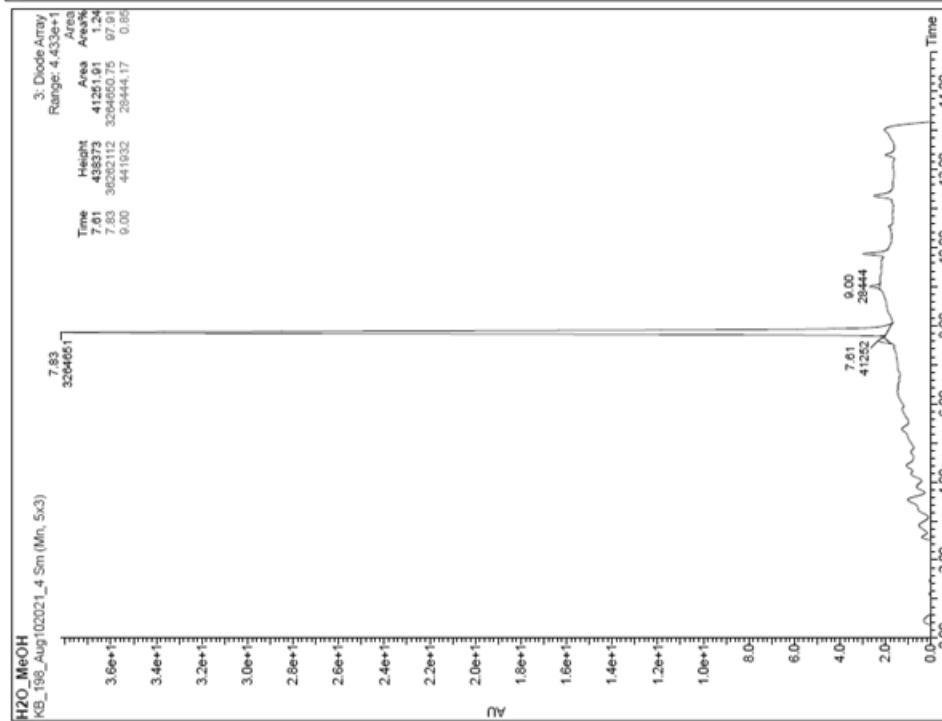

(B)

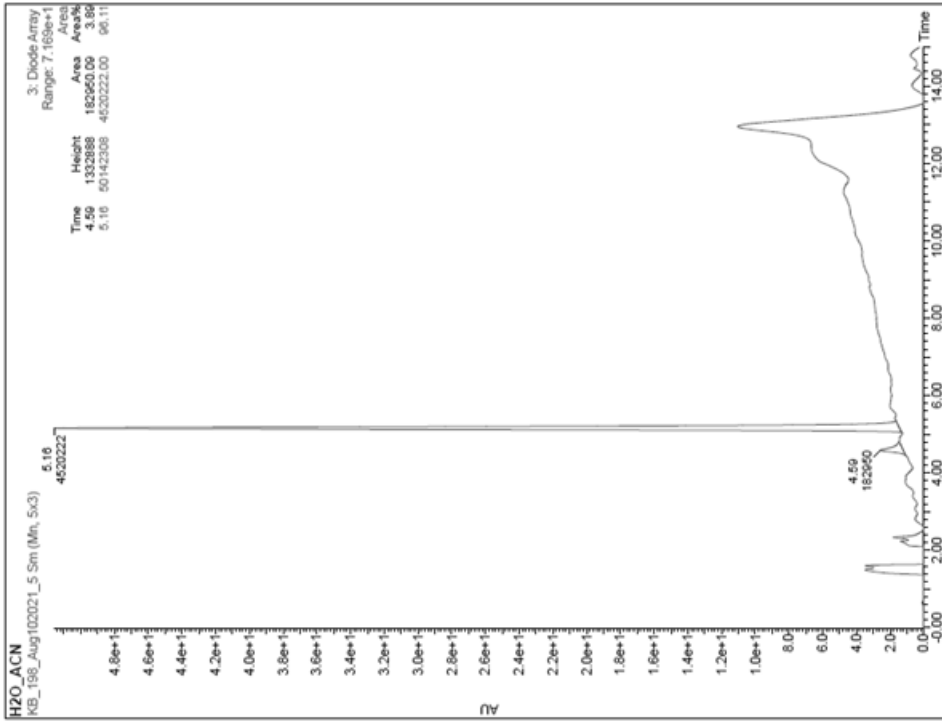

**Figure S12.** HPLC-PDA chromatogram of **KB-198** using the method as described in Section 4.4 of main text. (A) Method A and (B) Method B.

(A)

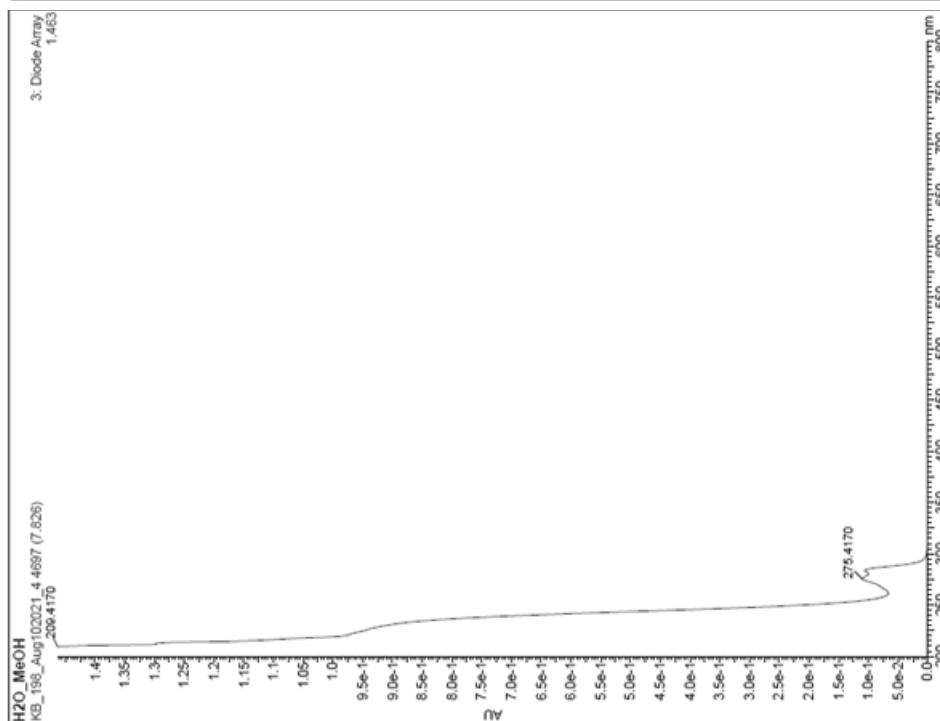

(B)

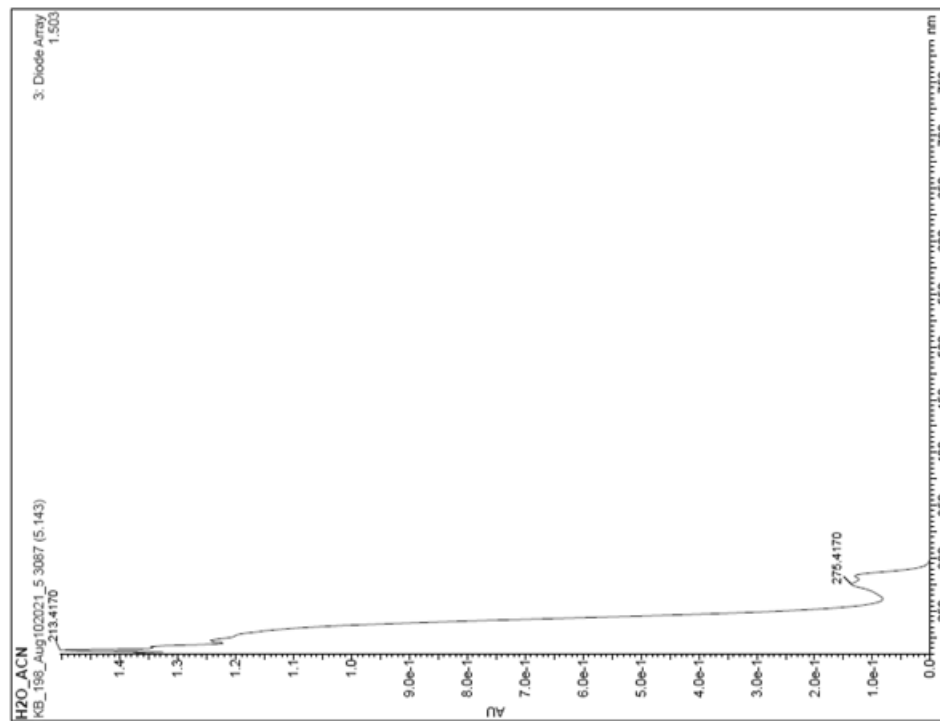

**Figure S13.** HPLC-PDA spectrum of **KB-198** using the method as described in Section 4.4 of main text. (A) Method A and (B) Method B.

(A)

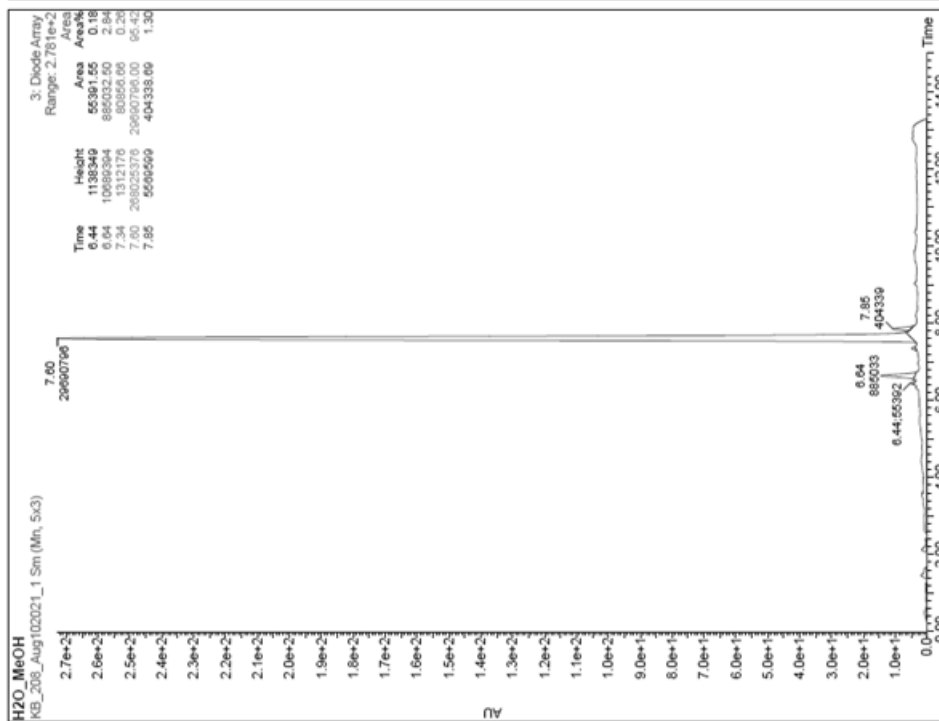

(B)

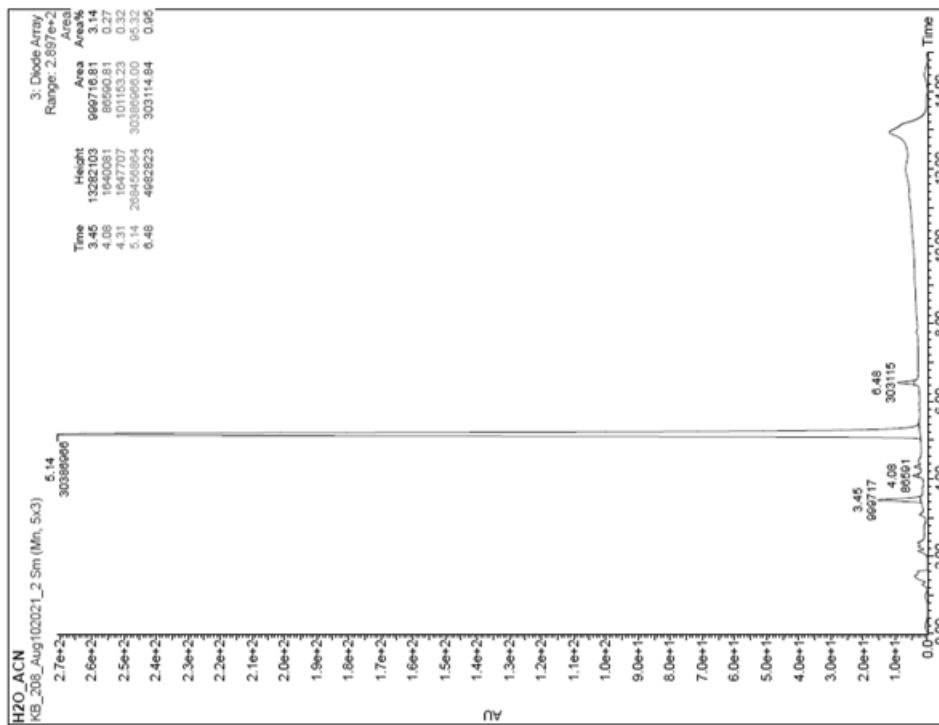

**Figure S14.** HPLC-PDA chromatogram of **KB-208** using the method as described in Section 4.4 of main text. (A) Method A and (B) Method B.

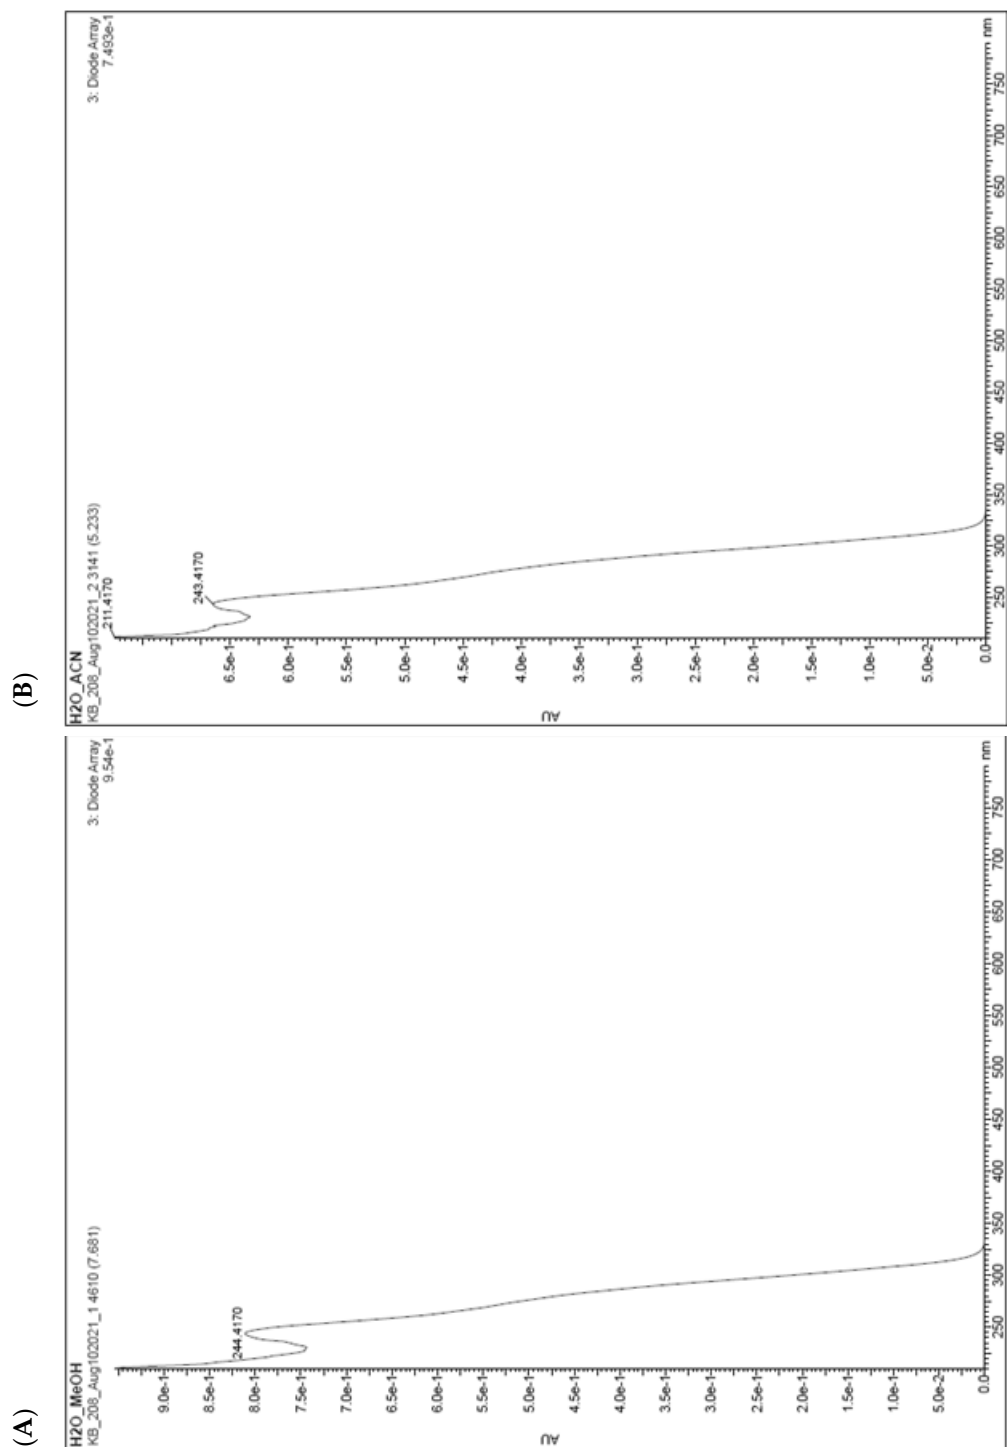

**Figure S15.** HPLC-PDA spectrum of **KB-208** using the method as described in Section 4.4 of main text. (A) Method A and (B) Method B.

(B)

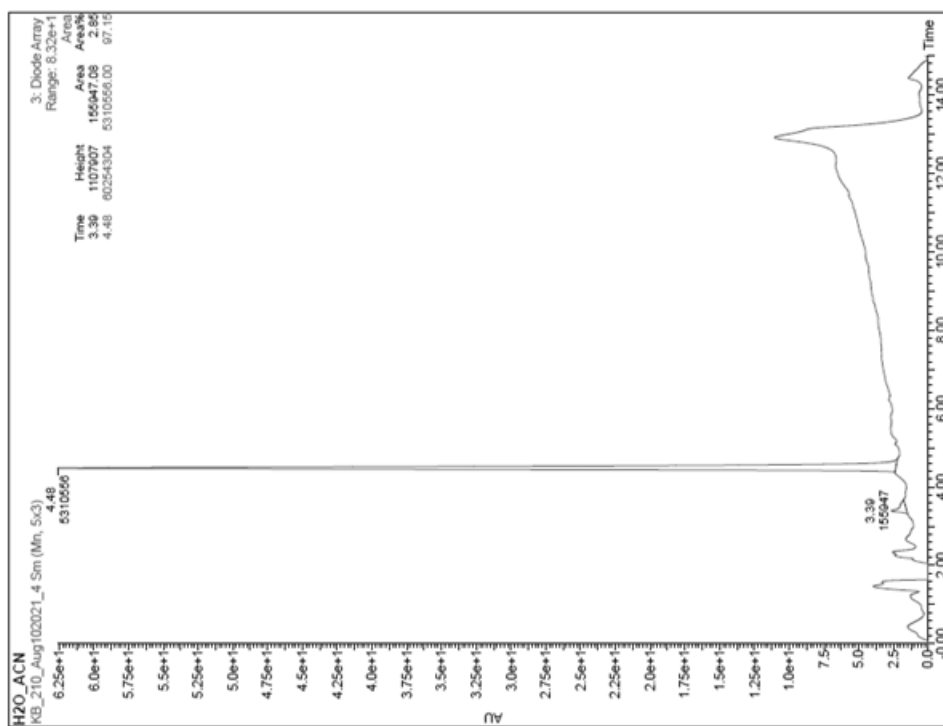

(A)

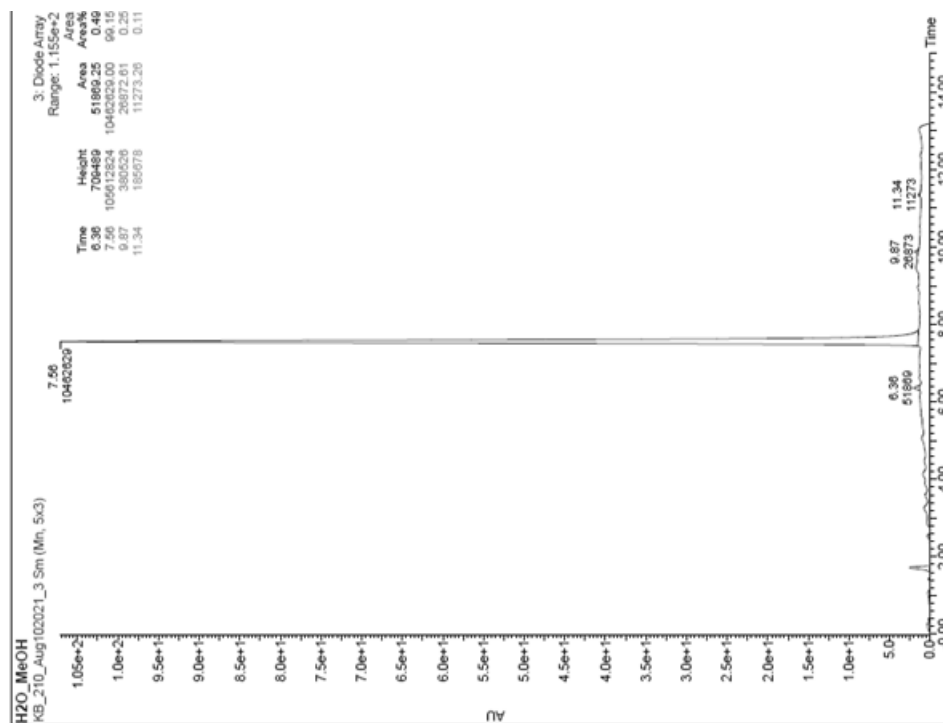

**Figure S16.** HPLC-PDA chromatogram of **KB-210** using the method as described in Section 4.4 of main text. (A) Method A and (B) Method B.

(A)

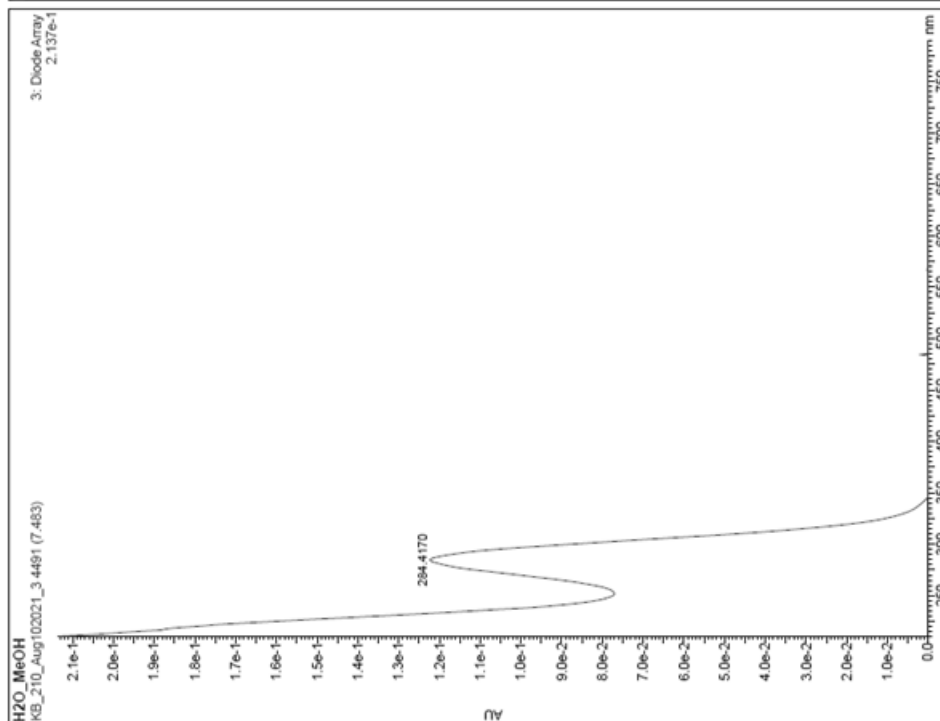

(B)

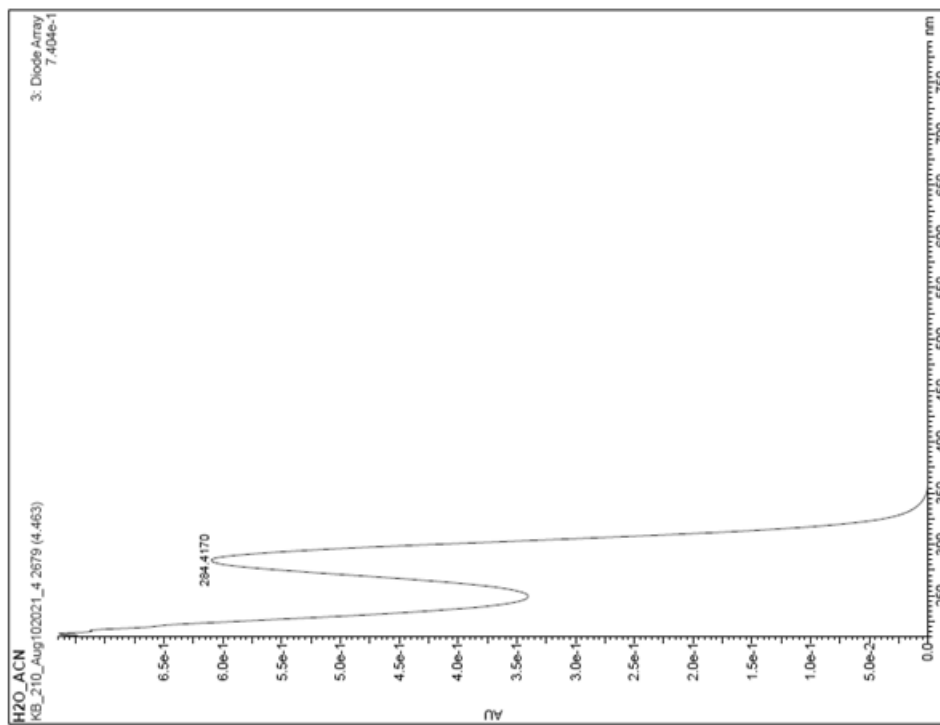

**Figure S17.** HPLC-PDA spectrum of **KB-210** using the method as described in Section 4.4 of main text. (A) Method A and (B) Method B.

## Reference

6. Purohit, M.K.; Chakka, S.K.; Scovell, I.; Neschadim, A.; Bello, A.M.; Salum, N.; Katsman, Y.; Bareau, M.C.; Branch, D.R.; Kotra, L.P. Structure-activity relationships of pyrazole derivatives as potential therapeutics for immune thrombocytopenias. *Bioorg. Med. Chem.* **2014**, *22*, 2739–2752. <https://doi.org/10.1016/j.bmc.2014.03.016>.
